# Supplementary material for: Impurity-induced acceleration of polymorphic conversion via crystalline solid solutions and the T–X phase diagrams of salicylic acid and 3-hydroxybenzoic acid
Source: Royal Society of Chemistry journal article supplement (doi:10.1039/d4ce00784k), 2024-01-01
Supplement: d4ce00784k1.pdf [file d4ce00784k1.pdf]

Supporting information to:

Impurity-induced Acceleration of Polymorphic Conversion via Crystalline Solid Solutions and the T-X Phase Diagrams of Salicylic acid and 3-Hydroxybenzoic acid

Tao Zhang, Francesco Ricci, Seyed Sepehr Mohajerani, Mitchell Paoello, Fredrik L. Nordstrom\*

Material & Analytical Sciences, Boehringer-Ingelheim, Ridgefield, 06877, Connecticut, USA. Email: fredrik.nordstrom@boehringer-ingelheim.com

Department of Physics, Stevens Institute of Technology, Hoboken, 07030, New Jersey, USA

Department of Chemical Engineering, Rowan University, Glassboro, 08028, New Jersey, USA

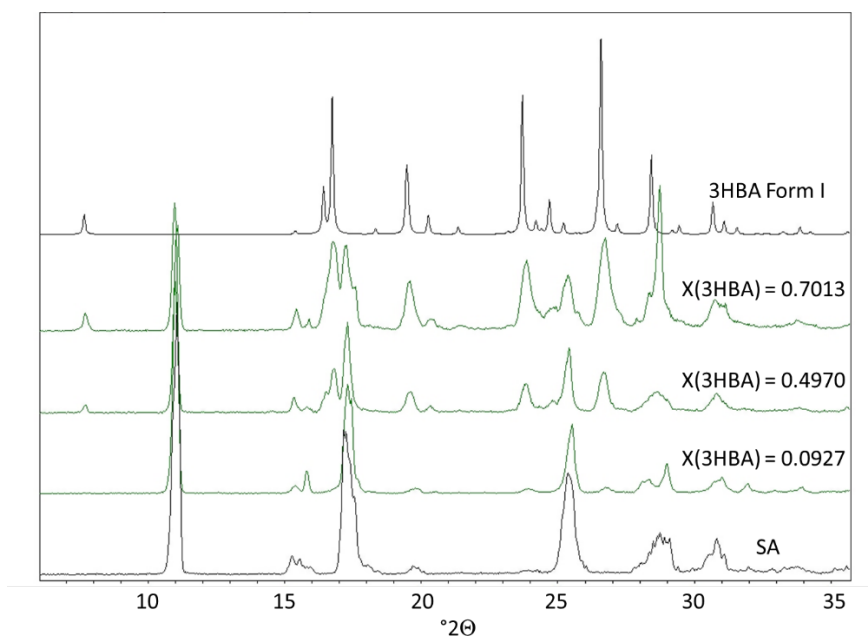

Figure 1. XRPD overlay of select SA-3HBA Form I samples used in DSC analyses.

Table 1. DSC summary for SA-3HBA Form I

| X(3HBA)              | DSC endotherms                       | Low temperature endotherm |                    |                   |                               |                   | High temperature endotherm |                    |                   |                     |                   |
|----------------------|--------------------------------------|---------------------------|--------------------|-------------------|-------------------------------|-------------------|----------------------------|--------------------|-------------------|---------------------|-------------------|
| mol 3HBA/mol SA+3HBA |                                      | T <sub>inset</sub>        | T <sub>onset</sub> | T <sub>peak</sub> | T <sub>offset</sub>           | Enthalpy          | T <sub>inset</sub>         | T <sub>onset</sub> | T <sub>peak</sub> | T <sub>offset</sub> | Enthalpy          |
|                      |                                      | °C                        | °C                 | °C                | °C                            | J/g               | °C                         | °C                 | °C                | °C                  | J/g               |
| 0                    | One endotherm                        |                           |                    |                   |                               |                   | 154.07<br>(0.08)           | 158.64<br>(0.006)  | 159.16<br>(0.09)  | 160.98<br>(0.23)    | 189.56<br>(4.21)  |
| 0.0031               | One endotherm                        |                           |                    |                   |                               |                   | 152.33<br>(0.26)           | 158.41<br>(0.32)   | 158.83<br>(0.10)  | 160.86<br>(0.64)    | 178.97<br>(13.18) |
| 0.0050               | One endotherm                        |                           |                    |                   |                               |                   | 151.87<br>(0.57)           | 157.55<br>(0.20)   | 158.70<br>(0.09)  | 160.33<br>(0.23)    | 174.50<br>(3.49)  |
| 0.0099               | Two partially overlapping endotherms | 143.14<br>(0.56)          | 145.01<br>(1.08)   | 147.39<br>(0.16)  | 149.33 <sup>1</sup><br>(0.66) | 7.59<br>(4.45)    |                            | 157.11<br>(0.80)   | 158.74<br>(0.20)  | 160.53<br>(0.02)    | 168.97<br>(10.7)  |
| 0.0177               | Two partially overlapping endotherms | 141.12<br>(0.45)          | 145.70<br>(1.11)   | 147.13<br>(0.42)  | 149.72 <sup>1</sup><br>(1.52) | 14.19<br>(6.53)   |                            | 155.95<br>(0.88)   | 158.35<br>(0.28)  | 160.44<br>(0.39)    | 168.84<br>(8.47)  |
| 0.0443               | Two partially overlapping endotherms | 140.27<br>(0.14)          | 144.06<br>(0.20)   | 147.47<br>(0.22)  | 149.72 <sup>1</sup><br>(1.12) | 42.22<br>(10.97)  |                            | 153.98<br>(0.95)   | 157.33<br>(0.90)  | 159.48<br>(0.50)    | 132.71<br>(20.71) |
| 0.0927               | Two partially overlapping endotherms | 140.10<br>(0.10)          | 143.97<br>(0.03)   | 147.23<br>(0.09)  | 149.81 <sup>1</sup><br>(0.09) | 88.25<br>(1.55)   |                            |                    | 155.03<br>(0.32)  | 157.50<br>(0.22)    | 91.92<br>(5.15)   |
| 0.1463               | Two endotherms mostly overlapping    | 140.50<br>(0.11)          | 144.33<br>(0.03)   | 146.50<br>(0.22)  | 149.40 <sup>1</sup><br>(0.16) | 138.06<br>(9.42)  |                            |                    | 152.50<br>(0.26)  | 155.27<br>(0.95)    | 54.78<br>(9.03)   |
| 0.1984               | Two endotherms mostly overlapping    | 140.35<br>(0.29)          | 144.44<br>(0.03)   | 146.68<br>(0.39)  | 149.36 <sup>1</sup><br>(0.05) | 156.82<br>(14.87) |                            |                    |                   | 154.48<br>(0.73)    | 38.24<br>(12.97)  |
| 0.2378               | Two endotherms mostly overlapping    | 141.02<br>(0.32)          | 144.49<br>(0.02)   | 146.84<br>(0.32)  | 148.81 <sup>1</sup><br>(0.22) | 188.32<br>(8.12)  |                            |                    |                   | 154.97<br>(1.49)    | 5.74<br>(5.44)    |
| 0.2993               | Two endotherms mostly overlapping    | 140.65<br>(0.01)          | 144.64<br>(0.06)   | 146.46<br>(0.37)  | 149.70 <sup>1</sup><br>(0.14) | 183.99<br>(5.05)  |                            |                    |                   | 160.13<br>(1.78)    | 11.77<br>(6.26)   |
| 0.3947               | Two endotherms mostly overlapping    | 140.47<br>(0.26)          | 144.72<br>(0.07)   | 146.42<br>(0.09)  | 149.62 <sup>1</sup><br>(0.16) | 171.99<br>(6.19)  |                            |                    |                   | 167.81<br>(3.80)    | 26.13<br>(7.14)   |
| 0.4970               | Two partially overlapping endotherms | 139.61<br>(0.30)          | 144.66<br>(0.01)   | 146.05<br>(0.07)  | 149.58 <sup>1</sup><br>(0.53) | 135.75<br>(10.27) |                            |                    | 171.72<br>(2.24)  | 179.64<br>(3.10)    | 71.79<br>(16.00)  |
| 0.6005               | Two partially overlapping endotherms | 139.73<br>(0.01)          | 144.80<br>(0.01)   | 146.38<br>(0.28)  | 149.35 <sup>1</sup><br>(0.11) | 117.25<br>(4.10)  |                            |                    | 180.13<br>(7.58)  | 188.24<br>(6.06)    | 99.63<br>(11.92)  |

|        |                                      |                  |                  |                  |                               |                 |                  |                  |                  |                  |                   |
|--------|--------------------------------------|------------------|------------------|------------------|-------------------------------|-----------------|------------------|------------------|------------------|------------------|-------------------|
| 0.7013 | Two partially overlapping endotherms | 139.77<br>(0.96) | 144.25<br>(0.11) | 146.19<br>(0.14) | 148.51 <sup>1</sup><br>(0.25) | 70.88<br>(7.34) |                  | 183.38<br>(5.55) | 189.24<br>(2.59) | 193.74<br>(2.41) | 158.78<br>(39.29) |
| 0.8073 | Two mostly separated endotherms      | 138.16<br>(1.52) | 145.67<br>(2.12) | 146.57<br>(0.20) | 149.44 <sup>1</sup><br>(0.58) | 37.83<br>(6.59) |                  | 201.44<br>(0.03) | 200.22<br>(3.42) | 202.57<br>(2.59) | 198.76<br>(4.61)  |
| 0.8987 | Two mostly separated endotherms      | 138.54<br>(0.79) | 141.79<br>(2.27) | 145.86<br>(0.97) | 148.65 <sup>1</sup><br>(0.87) | 7.74<br>(4.05)  |                  | 201.35<br>(0.07) | 202.07<br>(0.11) | 204.25<br>(0.26) | 238.56<br>(2.63)  |
| 0.9504 | One endotherm                        |                  |                  |                  |                               |                 | 183.73<br>(0.25) | 201.51<br>(0.27) | 202.15<br>(0.25) | 204.78<br>(0.37) | 246.14<br>(3.24)  |
| 0.9601 | One endotherm                        |                  |                  |                  |                               |                 | 186.84<br>(1.38) | 201.38<br>(0.11) | 202.25<br>(0.15) | 204.64<br>(0.23) | 244.64<br>(13.22) |
| 0.9702 | One endotherm                        |                  |                  |                  |                               |                 | 187.60<br>(0.70) | 201.36<br>(0.14) | 202.14<br>(0.14) | 204.43<br>(0.48) | 243.81<br>(7.16)  |
| 0.9797 | One endotherm                        |                  |                  |                  |                               |                 | 190.95<br>(1.18) | 201.41<br>(0.02) | 202.09<br>(0.07) | 204.23<br>(0.11) | 246.09<br>(5.68)  |
| 0.9905 | One endotherm                        |                  |                  |                  |                               |                 | 182.37<br>(1.71) | 201.24<br>(0.07) | 202.05<br>(0.12) | 203.98<br>(0.32) | 247.55<br>(5.92)  |
| 1.000  | One endotherm                        |                  |                  |                  |                               |                 | 194.51<br>(0.69) | 201.40<br>(0.03) | 202.11<br>(0.13) | 204.22<br>(0.44) | 248.94<br>(3.77)  |

1 Mid-point between endotherms is used as an approximation of the baseline offset temperature of the low-temperature endotherm. This separation also provides the calculation of the enthalpy of both the low- and high-temperature endotherms, when possible.

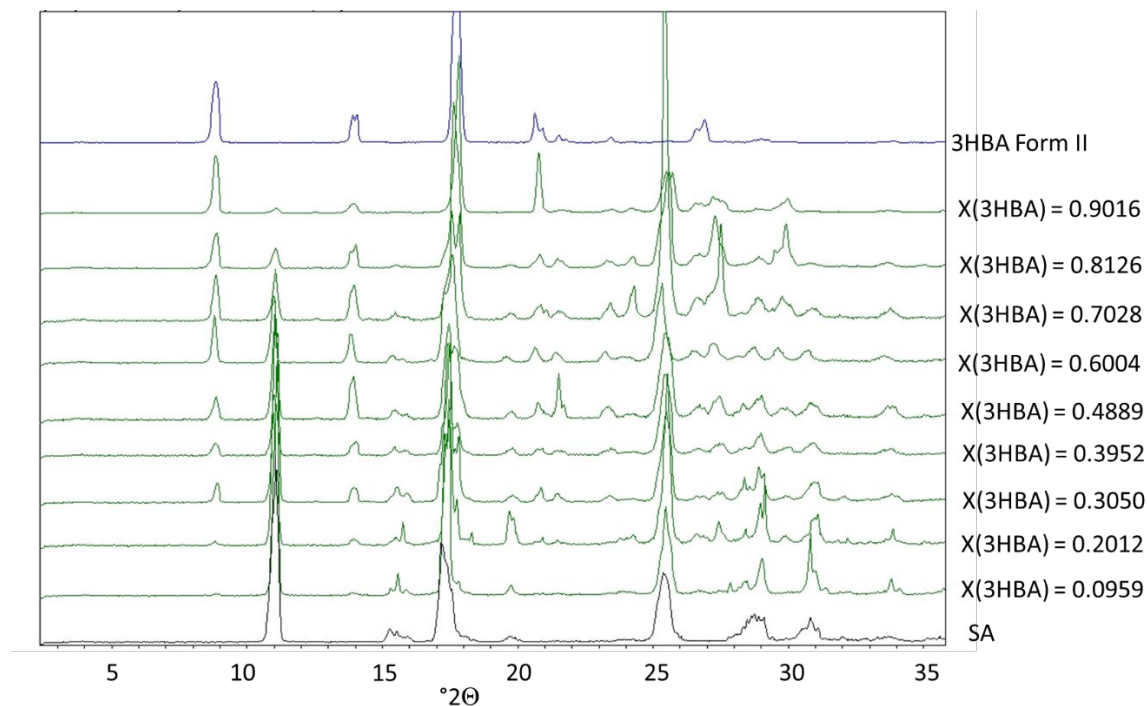

Figure 2. XRPD overlay of select SA-3HBA Form II samples used in DSC analyses prepared via evaporative crystallization from MeOH.

Table 2. DSC summary for SA-3HBA Form II

| X(3HBA)<br>3HBA/mol<br>SA+3HBA | DSC<br>endotherms                                     | Low temperature endotherm |                    |                   |                               |                  | High temperature endotherm                |                    |                   |                     |                  |
|--------------------------------|-------------------------------------------------------|---------------------------|--------------------|-------------------|-------------------------------|------------------|-------------------------------------------|--------------------|-------------------|---------------------|------------------|
|                                |                                                       | T <sub>inset</sub>        | T <sub>onset</sub> | T <sub>peak</sub> | T <sub>offset</sub>           | Enthalpy         | T <sub>inset</sub>                        | T <sub>onset</sub> | T <sub>peak</sub> | T <sub>offset</sub> | Enthalpy         |
|                                |                                                       | °C                        | °C                 | °C                | °C                            | J/g              | °C                                        | °C                 | °C                | °C                  | J/g              |
| 0                              | One endotherm                                         |                           |                    |                   |                               |                  | 154.07<br>(0.08)                          | 158.64<br>(0.006)  | 159.16<br>(0.09)  | 160.98<br>(0.23)    | 189.56<br>(4.21) |
| 0.0038                         | One endotherm                                         |                           |                    |                   |                               |                  | 152.60<br>(0.73)                          | 158.06<br>(0.12)   | 159.13<br>(0.09)  | 161.09<br>(0.15)    | 185.24<br>(5.02) |
| 0.0062                         | One endotherm                                         |                           |                    |                   |                               |                  | 154.04<br>(0.51)                          | 158.01<br>(0.22)   | 158.85<br>(0.12)  | 160.85<br>(0.20)    | 184.04<br>(6.26) |
| 0.0079                         | One endotherm                                         |                           |                    |                   |                               |                  | 152.59<br>(0.28)                          | 157.74<br>(0.11)   | 158.81<br>(0.16)  | 160.93<br>(0.24)    | 180.93<br>(1.96) |
| 0.0103                         | Two separated endotherms                              | 141.72<br>(0.41)          | 142.71<br>(0.08)   | 144.12<br>(0.06)  | 145.88<br>(0.39)              | 1.50<br>(0.38)   | 149.41<br>(0.36)                          | 157.27<br>(0.34)   | 158.89<br>(0.09)  | 160.63<br>(0.22)    | 171.06<br>(9.7)  |
| 0.0307                         | Two partially overlapping endotherms                  | 140.28<br>(0.24)          | 143.50<br>(0.12)   | 144.63<br>(0.02)  | 146.50 <sup>1</sup><br>(0.28) | 13.56<br>(0.47)  |                                           | 154.31<br>(0.06)   | 157.66<br>(0.14)  | 159.72<br>(0.25)    | 162.64<br>(5.19) |
| 0.0508                         | Two partially overlapping endotherms                  | 139.11<br>(0.11)          | 143.41<br>(0.10)   | 144.76<br>(0.01)  | 146.54 <sup>1</sup><br>(0.24) | 31.30<br>(2.31)  |                                           | 152.63<br>(0.25)   | 156.53<br>(0.18)  | 158.67<br>(0.23)    | 146.43<br>(2.99) |
| 0.0699                         | Two partially overlapping endotherms                  | 138.45<br>(0.42)          | 143.52<br>(0.04)   | 144.80<br>(0.03)  | 146.88 <sup>1</sup><br>(0.07) | 49.12<br>(6.83)  |                                           | 150.92<br>(1.45)   | 155.47<br>(0.38)  | 158.18<br>(0.24)    | 129.74<br>(2.87) |
| 0.0959                         | Two partially overlapping endotherms                  | 138.66<br>(0.53)          | 142.18<br>(0.02)   | 144.78<br>(0.08)  | 147.14 <sup>1</sup><br>(0.07) | 67.36<br>(2.24)  |                                           | 150.87<br>(2.16)   | 154.66<br>(0.31)  | 157.27<br>(0.62)    | 112.64<br>(5.16) |
| 0.2012                         | Two endotherms mostly overlapping                     | 137.48<br>(0.56)          | 142.22<br>(0.02)   | 144.59<br>(0.04)  |                               | 152.40<br>(0.45) |                                           |                    |                   | 152.64<br>(1.22)    | 35.88<br>(3.40)  |
| 0.2489                         | Two endotherms mostly overlapping                     | 138.18<br>(0.19)          | 142.19<br>(0.02)   | 144.05<br>(0.23)  |                               | 173.28<br>(2.16) |                                           |                    |                   | 151.98<br>(1.64)    | 17.22<br>(0.35)  |
| 0.3050                         | Two endotherms mostly overlapping                     | 137.90<br>(0.30)          | 142.44<br>(0.20)   | 143.92<br>(0.17)  |                               | 178.83<br>(5.37) | Not accessible due to form transformation |                    |                   |                     |                  |
| 0.3952                         | Two endotherms mostly overlapping                     | 137.48<br>(0.95)          | 142.30<br>(0.03)   | 143.80<br>(0.20)  |                               | 170.72<br>(3.37) | Not accessible due to form transformation |                    |                   |                     |                  |
| 0.4889                         | Two partially overlapping endotherms and one exotherm | 138.83<br>(1.03)          | 142.24<br>(0.04)   | 144.12<br>(0.20)  | 146.53 <sup>1</sup><br>(0.28) | 140.28<br>(6.02) | Not accessible due to form transformation |                    |                   |                     |                  |

|        |                                                       |                  |                  |                  |                  |                  |                                           |
|--------|-------------------------------------------------------|------------------|------------------|------------------|------------------|------------------|-------------------------------------------|
| 0.6004 | Two partially overlapping endotherms and one exotherm | 138.77<br>(0.18) | 142.04<br>(0.04) | 143.77<br>(0.15) | 145.98<br>(0.29) | 103.71<br>(2.69) | Not accessible due to form transformation |
| 0.7028 | Two partially overlapping endotherms and one exotherm | 138.47<br>(0.25) | 141.98<br>(0.09) | 143.38<br>(0.09) | 145.62<br>(0.34) | 69.12<br>(4.32)  | Not accessible due to form transformation |
| 0.8126 | Two partially overlapping endotherms and one exotherm | 137.30<br>(0.13) | 141.65<br>(0.04) | 143.18<br>(0.12) | 145.19<br>(0.27) | 49.83<br>(3.75)  | Not accessible due to form transformation |
| 0.9016 | Two mostly separated endotherms and one exotherm      | 136.04<br>(0.95) | 140.86<br>(0.12) | 142.60<br>(0.11) | 144.42<br>(0.37) | 18.83<br>(2.80)  | Not accessible due to form transformation |
| 0.9513 | Two separated endotherms and one exotherm             | 134.94<br>(1.13) | 139.76<br>(0.10) | 141.99<br>(0.08) | 144.11<br>(0.49) | 8.1<br>(0.78)    | Not accessible due to form transformation |
| 0.9754 | Two separated endotherms and one exotherm             | 134.07<br>(0.97) | 135.95<br>(2.34) | 139.61<br>(1.45) | 142.81<br>(0.24) | 3.30<br>(0.23)   | Not accessible due to form transformation |
| 0.9904 | One endotherm                                         |                  |                  |                  |                  |                  | Not accessible due to form transformation |
| 1.000  | One endotherm                                         |                  |                  |                  |                  |                  | Not accessible due to form transformation |

1 Mid-point between endotherms is used as an approximation of the baseline offset temperature of the low-temperature endotherm. This separation also provides the calculation of the enthalpy of both the low- and high-temperature endotherms, when possible.

Table 3. DSC summary for SA-3HBA Form II: Exothermic transition from Form II (or  $\beta$ II) to Form I (or  $\beta$ I) of 3HBA

| X(3HBA)              | T <sub>inset</sub> | T <sub>onset</sub> | T <sub>peak</sub> | T <sub>offset</sub> | Enthalpy of exotherm |
|----------------------|--------------------|--------------------|-------------------|---------------------|----------------------|
| mol 3HBA/mol SA+3HBA | °C                 | °C                 | °C                | °C                  | J/g                  |
| 0.4889               | 156.64<br>(1.39)   | 158.50<br>(0.93)   | 161.60<br>(0.77)  | 165.33<br>(0.71)    | 15.1<br>(1.12)       |
| 0.6004               | 154.37<br>(0.17)   | 156.09<br>(0.18)   | 158.94<br>(0.17)  | 161.6<br>(0.27)     | 7.69<br>(0.72)       |
| 0.7028               | 154.76<br>(2.82)   | 160.73<br>(0.25)   | 164.02<br>(0.27)  | 168.71<br>(2.09)    | 11.32<br>(1.07)      |
| 0.8126               | 153.27<br>(0.63)   | 158.05<br>(0.31)   | 162.39<br>(0.19)  | 167.10<br>(0.37)    | 10.26<br>(1.11)      |
| 0.9016               | 158.33<br>(1.47)   | 160.50<br>(0.93)   | 164.98<br>(0.95)  | 170.32<br>(0.37)    | 6.21<br>(2.62)       |
| 0.9513               | 161.18<br>(1.39)   | 163.11<br>(2.05)   | 167.76<br>(2.19)  | 171.99<br>(1.78)    | 2.47<br>(0.19)       |
| 0.9754               | 154.59<br>(3.02)   | 156.23<br>(3.62)   | 160.43<br>(2.57)  | 165.55<br>(2.43)    | 2.43<br>(0.92)       |
| 0.9904               | 145.73<br>(2.00)   | 147.64<br>(2.01)   | 152.78<br>(0.98)  | 159.36<br>(0.77)    | 1.83<br>(0.38)       |
| 1.000                | 142.21<br>(2.20)   | 143.41<br>(1.57)   | 150.40<br>(0.74)  | 159.36<br>(2.31)    | 3.17<br>(0.31)       |

Table 4. Solid-Liquid Equilibria (SLE) summary of SA-3HBA Form I in 40 w% MeOH in H<sub>2</sub>O at 25°C

| Solid phase | Liquid                | Solid                 | Conc. of SA     | Conc. of 3HBA     | X(SA)               | X(3HBA)               | X(solvent)              |
|-------------|-----------------------|-----------------------|-----------------|-------------------|---------------------|-----------------------|-------------------------|
|             | w% or mol% 3HBA in SA | w% or mol% 3HBA in SA | mg SA/g solvent | mg 3HBA/g solvent | mmol SA/(mol total) | mmol 3HBA/(mol total) | mol solvent/(mol total) |
| SA          | 0.00%                 | 0.00%                 | 23.37           | 0.00              | 3.6813              | 0.0000                | 0.9963                  |
| $\alpha$    | 18.25%                | 0.04%                 | 26.81           | 5.99              | 4.2173              | 0.9416                | 0.9948                  |
| $\alpha$    | 26.67%                | 0.08%                 | 27.63           | 10.04             | 4.3423              | 1.5788                | 0.9941                  |



|                  |        |        |       |        |        |         |        |
|------------------|--------|--------|-------|--------|--------|---------|--------|
| $\alpha$         | 37.37% | 0.09%  | 29.52 | 17.61  | 4.6327 | 2.7639  | 0.9926 |
| $\alpha$         | 40.57% | 0.13%  | 29.78 | 20.33  | 4.6723 | 3.1897  | 0.9921 |
| $\alpha$         | 55.26% | 0.26%  | 34.06 | 42.06  | 5.3211 | 6.5720  | 0.9881 |
| $\alpha$         | 60.84% | 0.39%  | 39.53 | 61.41  | 6.1523 | 9.5570  | 0.9843 |
| $\alpha$         | 65.38% | 0.45%  | 43.14 | 81.46  | 6.6895 | 12.6310 | 0.9807 |
| $\alpha+\beta_I$ | 69.47% | 0.65%  | 51.83 | 117.96 | 7.9809 | 18.1642 | 0.9739 |
| $\alpha+\beta_I$ | 70.27% | 48.72% | 52.21 | 123.39 | 8.0317 | 18.9833 | 0.9730 |
| $\alpha+\beta_I$ | 69.64% | 78.71% | 53.47 | 122.65 | 8.2254 | 18.8676 | 0.9729 |
| $\alpha+\beta_I$ | 70.35% | 91.47% | 52.15 | 123.72 | 8.0221 | 19.0337 | 0.9729 |
| $\beta_I$        | 79.26% | 99.58% | 29.48 | 112.63 | 4.5586 | 17.4181 | 0.9780 |
| $\beta_I$        | 77.79% | 99.59% | 32.93 | 115.38 | 5.0883 | 17.8253 | 0.9771 |
| $\beta_I$        | 85.36% | 99.70% | 18.60 | 108.40 | 2.8825 | 16.8022 | 0.9803 |
| $\beta_I$        | 87.84% | 99.79% | 14.53 | 104.99 | 2.2547 | 16.2929 | 0.9815 |
| $\beta_I$        | 85.06% | 99.80% | 19.31 | 109.87 | 2.9914 | 17.0254 | 0.9800 |
| $\beta_I$        | 94.51% | 99.85% | 6.17  | 106.17 | 0.9581 | 16.4948 | 0.9825 |
| $\beta_I$        | 96.94% | 99.93% | 3.16  | 100.18 | 0.4924 | 15.5864 | 0.9839 |
| 3HBA,<br>Form I  | 100%   | 100%   | 0.00  | 98.36  | 0.0000 | 15.3148 | 0.9847 |

Table 5. Solid-Liquid Equilibria (SLE) summary of SA-3HBA Form II in 40 w% MeOH in H<sub>2</sub>O at 25°C

| Solid phase       | Liquid                | Solid                 | Conc. of SA     | Conc. of 3HBA     | X(SA)               | X(3HBA)               | X(solvent)              |
|-------------------|-----------------------|-----------------------|-----------------|-------------------|---------------------|-----------------------|-------------------------|
|                   | w% or mol% 3HBA in SA | w% or mol% 3HBA in SA | mg SA/g solvent | mg 3HBA/g solvent | mmol SA/(mol total) | mmol 3HBA/(mol total) | mol solvent/(mol total) |
| SA                | 0.00%                 | 0.00%                 | 23.37           | 0.00              | 3.6813              | 0.0000                | 0.9963                  |
| $\alpha$          | 18.25%                | 0.04%                 | 26.81           | 5.99              | 4.2173              | 0.9416                | 0.9948                  |
| $\alpha$          | 26.67%                | 0.08%                 | 27.63           | 10.04             | 4.3423              | 1.5788                | 0.9941                  |
| $\alpha$          | 37.37%                | 0.09%                 | 29.52           | 17.61             | 4.6327              | 2.7639                | 0.9926                  |
| $\alpha$          | 40.57%                | 0.13%                 | 29.78           | 20.33             | 4.6723              | 3.1897                | 0.9921                  |
| $\alpha$          | 55.26%                | 0.26%                 | 34.06           | 42.06             | 5.3211              | 6.5720                | 0.9881                  |
| $\alpha$          | 60.84%                | 0.39%                 | 39.53           | 61.41             | 6.1523              | 9.5570                | 0.9843                  |
| $\alpha$          | 65.38%                | 0.45%                 | 43.14           | 81.46             | 6.6895              | 12.6310               | 0.9807                  |
| $\alpha+\beta$ II | 73.37%                | 9.21%                 | 60.17           | 165.79            | 9.1853              | 25.3108               | 0.9655                  |
| $\alpha+\beta$ II | 72.92%                | 40.33%                | 60.31           | 162.41            | 9.2120              | 24.8068               | 0.9660                  |
| $\alpha+\beta$ II | 72.58%                | 58.11%                | 62.02           | 164.14            | 9.4682              | 25.0573               | 0.9655                  |
| $\beta$ II        | 80.93%                | 99.68%                | 35.59           | 150.99            | 5.4658              | 23.1907               | 0.9713                  |
| $\beta$ II        | 86.61%                | 99.73%                | 22.53           | 145.77            | 3.4707              | 22.4509               | 0.9741                  |
| $\beta$ II        | 87.77%                | 99.81%                | 19.89           | 142.76            | 3.0654              | 22.0069               | 0.9749                  |
| $\beta$ II        | 93.04%                | 99.82%                | 10.32           | 137.85            | 1.5943              | 21.2985               | 0.9771                  |
| 3HBA, Form II     | 100.00%               | 100.00%               | 0.00            | 130.54            | 0.0000              | 20.2229               | 0.9798                  |

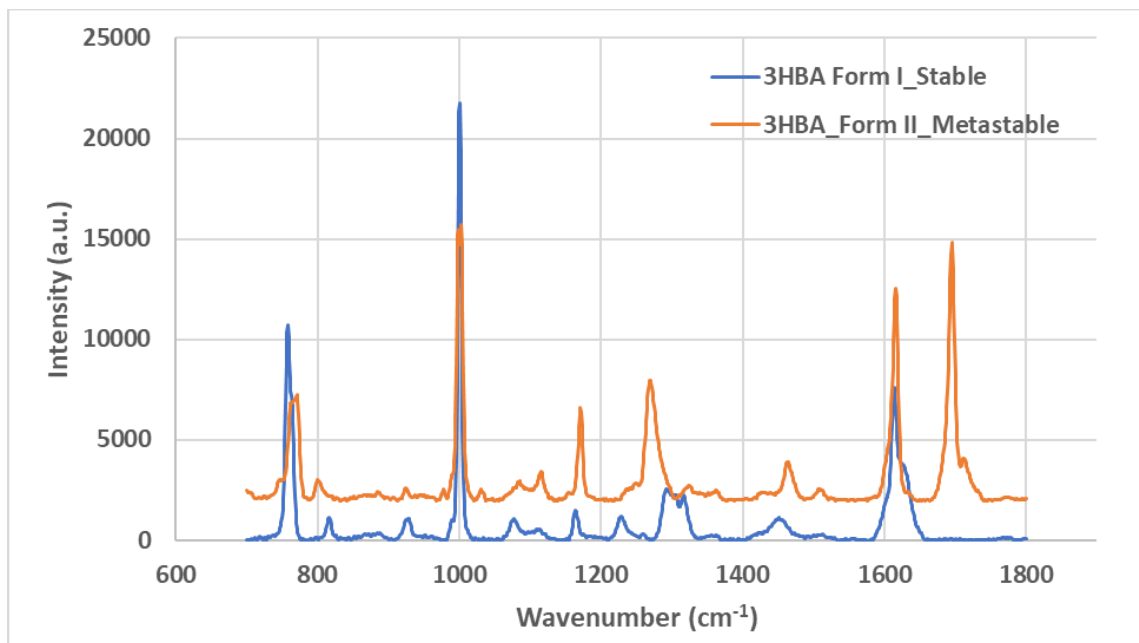

Figure 3. Reference spectra for 3HBA Form I and II. Peak area between 1685 and 1705  $\text{cm}^{-1}$  were used as reference to monitor polymorphic conversion rate

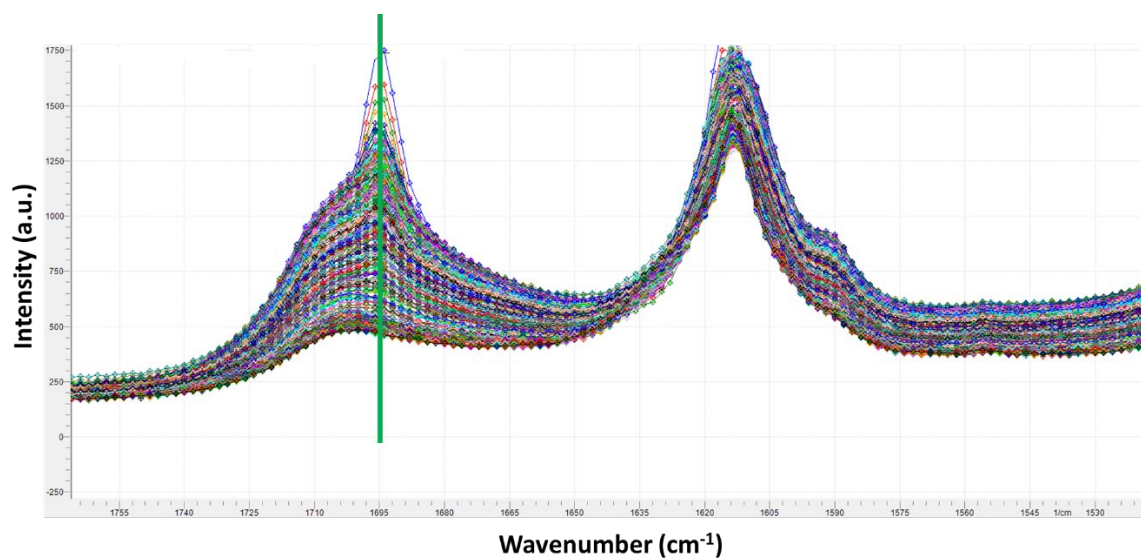

Figure 4. Example of changes in Raman spectra during a form conversion (wavelength: 1800 – 1500  $\text{cm}^{-1}$ )

## Thermodynamic Modelling via NRTL

### Fitting the Liquid BIPs $\Delta g_{12}^{L,\pi}$ and $\Delta g_{21}^{L,\pi}$

As mentioned in the text, for the liquid-state NRTL BIPs of 3-hydroxybenzoic acid (1) and salicylic acid (2),  $\Delta g_{12}^L$  and  $\Delta g_{21}^L$  were not expressed as functions of temperature due to the sparsity of solid-liquid equilibrium melt data (i.e., the SSLE data at the eutectic temperature). As also explained in the text, the  $\Delta g_{12}^L$  and  $\Delta g_{21}^L$  were treated separately for the equilibria involving  $\beta$ I and  $\beta$ II. Hence, we can succinctly denote the two different parameter sets as  $\{\Delta g_{12}^{L,\pi}, \Delta g_{21}^{L,\pi}\}$ , where  $\pi$  denotes the  $\beta$ -phase (I or II) involved in the phase equilibria.

As performed in our earlier study [Wang, Y. Ricci, F., Nordstrom, F.L., Terminal crystalline solid solutions and T-X phase diagram of salicylic acid – 4-hydroxybenzoic acid, Phys. Chem. Chem. Phys, 2024, 26, 3069.], a more in-depth study  $\Delta g_{12}^{L,\pi}$  and  $\Delta g_{21}^{L,\pi}$  was performed to assess the degeneracy of the liquid parameters with respect to the SSLE criteria which must be satisfied simultaneously:

$$\left\{ \gamma_i^\alpha x_i^\alpha f_i^S / f_i^L = \gamma_i^L x_i^L = \gamma_i^{\beta\pi} x_i^{\beta\pi} f_i^S / f_i^L \right\}_{i=1,2} \quad (\text{S1})$$

Numerically, the regression procedure requires determination of the parameters  $\Delta g_{12}^{L,\pi}$  and  $\Delta g_{21}^{L,\pi}$  to calculate  $\gamma_i^L$  (provided known values of  $\Delta g_{12}^S$  and  $\Delta g_{21}^S$ , which we obtained from regressing the solvus data to the T-dependent expressions described in the text, and hence known values of  $\gamma_i^S$ ). This was done by driving the objective function shown below to zero:

$$OF = \sum_{i=1}^2 \left( \gamma_i^\alpha x_i^\alpha f_i^S / f_i^L - \gamma_i^L x_i^L \right)^2 + \left( \gamma_i^{\beta\pi} x_i^{\beta\pi} f_i^S / f_i^L - \gamma_i^L x_i^L \right)^2 \quad (\text{S2})$$

Because there are only two regression parameters in the above equation ( $\Delta g_{12}^{L,\pi}$  and  $\Delta g_{21}^{L,\pi}$ ), one can easily visualize how the OF varies with the parameter values. Contour plots showing this functional dependency for both the  $\beta$ I and  $\beta$ II systems are illustrated below. These contour plots were used to locate the approximate minimum of the OF, and the corresponding approximate values of  $\Delta g_{12}^{L,\pi}$  and  $\Delta g_{21}^{L,\pi}$  were used as initial guesses in the regression algorithm.

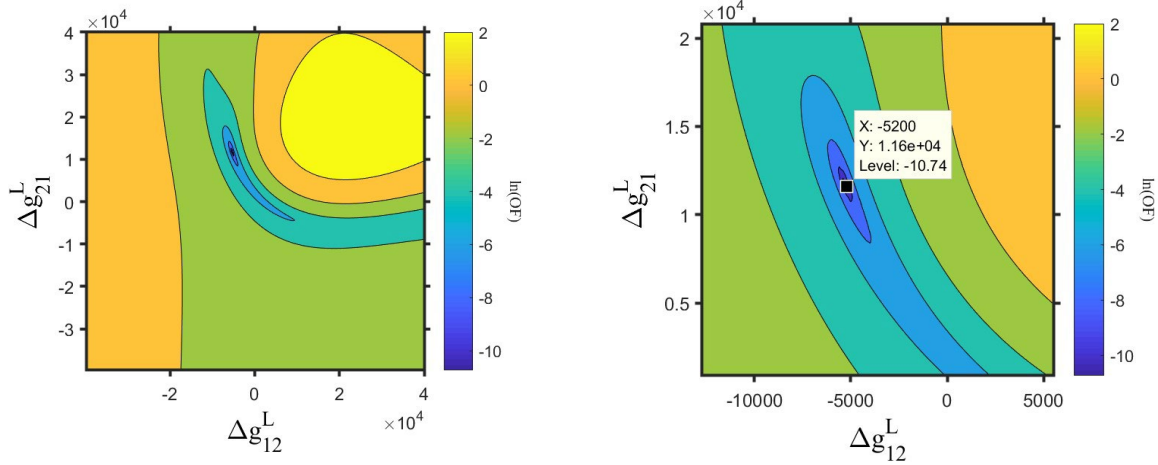

Figure 5. Objective function at SSLE ( $\alpha$ - $\beta$ I-L), with varying values of  $\Delta g_{12}^{L,I}$  and  $\Delta g_{21}^{L,I}$ . The right pane shows a zoomed view, with the data cursor showing the approximate location of the minimum.

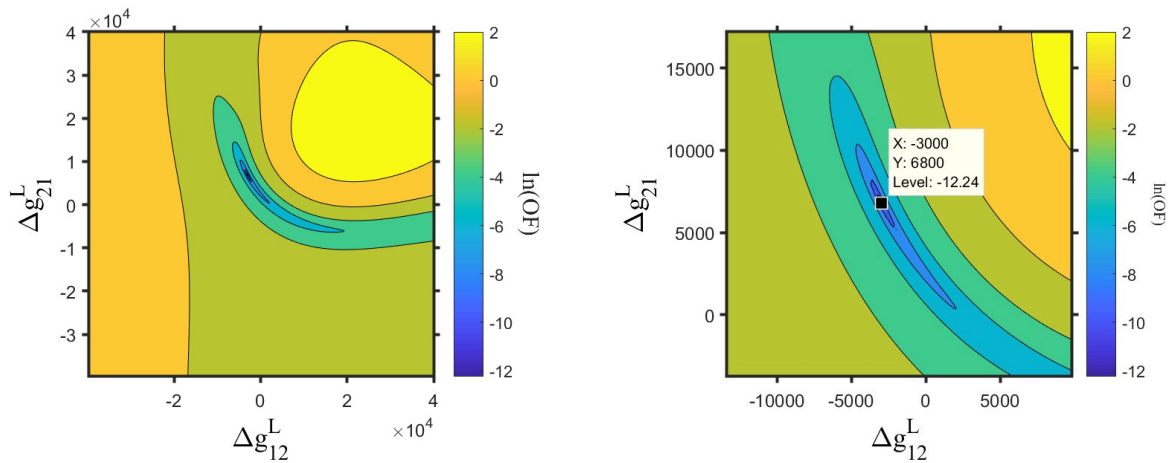

Figure 6. Objective function at SSLE ( $\alpha$ - $\beta$ II-L), with varying values of  $\Delta g_{12}^{L,II}$  and  $\Delta g_{21}^{L,II}$ . The right pane shows a zoomed view, with the data cursor showing the approximate location of the minimum.

We also note that it was attempted to predict the  $\alpha$ - $\beta$ II T-X phase diagram using the  $\Delta g_{12}^L$  and  $\Delta g_{21}^L$  values regressed to the  $\alpha$ - $\beta$ I data (e.g.,  $\{\Delta g_{12}^{L,I}, \Delta g_{21}^{L,I}\}$ ); however, the predicted eutectic composition was in significant error. A potentially more accurate approach for using only one set of  $\{\Delta g_{12}^L, \Delta g_{21}^L\}$  would be to regress these two parameters to both the  $\alpha$ - $\beta$ I and  $\alpha$ - $\beta$ II phase equilibria simultaneously.

## NRTL Parameter Values

The regressed NRTL BIP values are provided below. We note once again that the non-randomness parameters ( $\alpha_{ij}$ ) were all taken as 0.2 for both the solid and liquid state models. We reiterate that the liquid state BIPs for components 1 and 2  $\{\Delta g_{12}^{L,I}, \Delta g_{21}^{L,I}\}$  and  $\{\Delta g_{12}^{L,II}, \Delta g_{21}^{L,II}\}$  were regressed to SSLE data in the 1-2 system (i.e., with respect to the two solid solutions in equilibrium with the eutectic melt). The other liquid state BIPs involving the solvent (e.g.,  $\Delta g_{13}^{L,I}$ , etc...) were regressed to the solubility data in 40 w% MeOH in H<sub>2</sub>O, where this fixed-composition binary solvent mixture was treated as a pseudo pure solvent.

Table 6. NRTL Solid State BIPs

|                          |                                            |
|--------------------------|--------------------------------------------|
| $\Delta g_{12}^{S,I} :$  |                                            |
|                          | $c_{12}^{S,I} = 18185.8959 \text{ J/mol}$  |
|                          | $d_{12}^{S,I} = -32.149 \text{ J/mol-K}$   |
| $\Delta g_{21}^{S,I} :$  |                                            |
|                          | $c_{21}^{S,I} = -3747.1294 \text{ J/mol}$  |
|                          | $d_{21}^{S,I} = 41.4138 \text{ J/mol-K}$   |
| $\Delta g_{12}^{S,II} :$ |                                            |
|                          | $c_{12}^{S,II} = 11139.8254 \text{ J/mol}$ |
|                          | $d_{12}^{S,II} = -6.839 \text{ J/mol-K}$   |
| $\Delta g_{21}^{S,II} :$ |                                            |
|                          | $c_{21}^{S,II} = -453.2698 \text{ J/mol}$  |
|                          | $d_{21}^{S,II} = 28.9163 \text{ J/mol-K}$  |

Table 7. NRTL Liquid State BIPs

|                        |                   |
|------------------------|-------------------|
| $\Delta g_{12}^{L,I}$  | -5230.7972 J/mol  |
| $\Delta g_{21}^{L,I}$  | 11619.6266 J/mol  |
| $\Delta g_{13}^{L,I}$  | 19762.0553 J/mol  |
| $\Delta g_{31}^{L,I}$  | -6585.69442 J/mol |
| $\Delta g_{23}^{L,I}$  | -4161.09328 J/mol |
| $\Delta g_{32}^{L,I}$  | 11119.0683 J/mol  |
| $\Delta g_{12}^{L,II}$ | -3002.0537 J/mol  |
| $\Delta g_{21}^{L,II}$ | 6858.9432 J/mol   |
| $\Delta g_{13}^{L,II}$ | -9017.86118 J/mol |
| $\Delta g_{31}^{L,II}$ | 17803.6867 J/mol  |
| $\Delta g_{23}^{L,II}$ | -7094.86151 J/mol |
| $\Delta g_{32}^{L,II}$ | 18299.0624 J/mol  |
